# Supplementary material for: Binding and recognition of AMP, ADP, ATP and related inorganic phosphate anions by a tren-based ligand containing a pyrimidine functionality
Source: Royal Society of Chemistry journal article supplement (doi:10.1039/c1nj20393b), 2011-01-01
Supplement: c1nj20393b.pdf [file c1nj20393b.pdf]

ELECTRONIC SUPPLEMENTARY INFORMATION  
for

**Binding and recognition of AMP, ADP, ATP and related inorganic phosphate anions by protonated forms of a tren-based ligand containing a pyrimidine functionality**

By

Paloma Arranz-Mascaros,<sup>a</sup> Carla Bazzicalupi,<sup>b</sup> Antonio Bianchi,<sup>\*b</sup> Claudia Giorgi,<sup>b</sup> Maria Luz Godino-Salido,<sup>a</sup> Maria Dolores Gutiérrez-Valero<sup>a</sup>, Rafael Lopez-Garzón<sup>\*a</sup> and Barbara Valtancoli.

<sup>a</sup> Department of Inorganic and Organic Chemistry, University of Jaén 23071, Jaén, Spain. E-mail: rlopez@ujaen.es

<sup>b</sup> Department of Chemistry “Ugo Schiff”, University of Florence, Via della Lastruccia 3, 50019, Sesto Fiorentino, Italy. E-mail: antonio.bianchi@unifi.it

CONTENT

|                                                                                                                                                  |    |
|--------------------------------------------------------------------------------------------------------------------------------------------------|----|
| Figure S1. Distribution diagrams of the complexes formed by HL with phosphate, diphosphate and triphosphate. ....                                | S2 |
| Figure S2. <sup>31</sup> P NMR spectra of phosphate, diphosphate and triphosphate in the absence and in the presence of HL with CIS values. .... | S3 |
| Figure S3. Selectivity diagrams calculated for the system HL/AMP, HL/ADP e HL/ATP. ....                                                          | S4 |

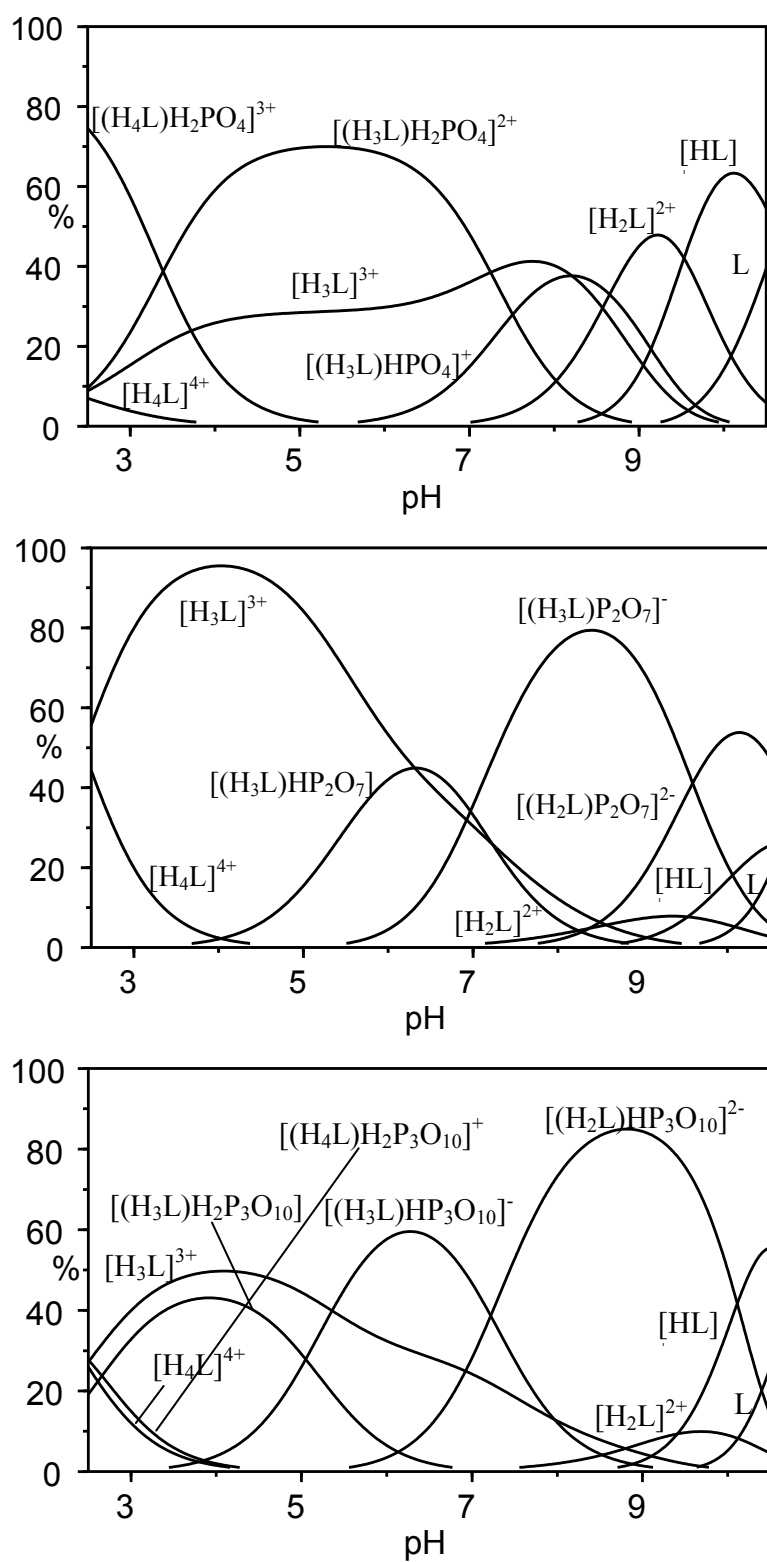

Figure S1. Distribution diagrams of the complexes formed by HL with phosphate, diphosphate and triphosphate. All reagents  $1 \times 10^{-3}$  M.

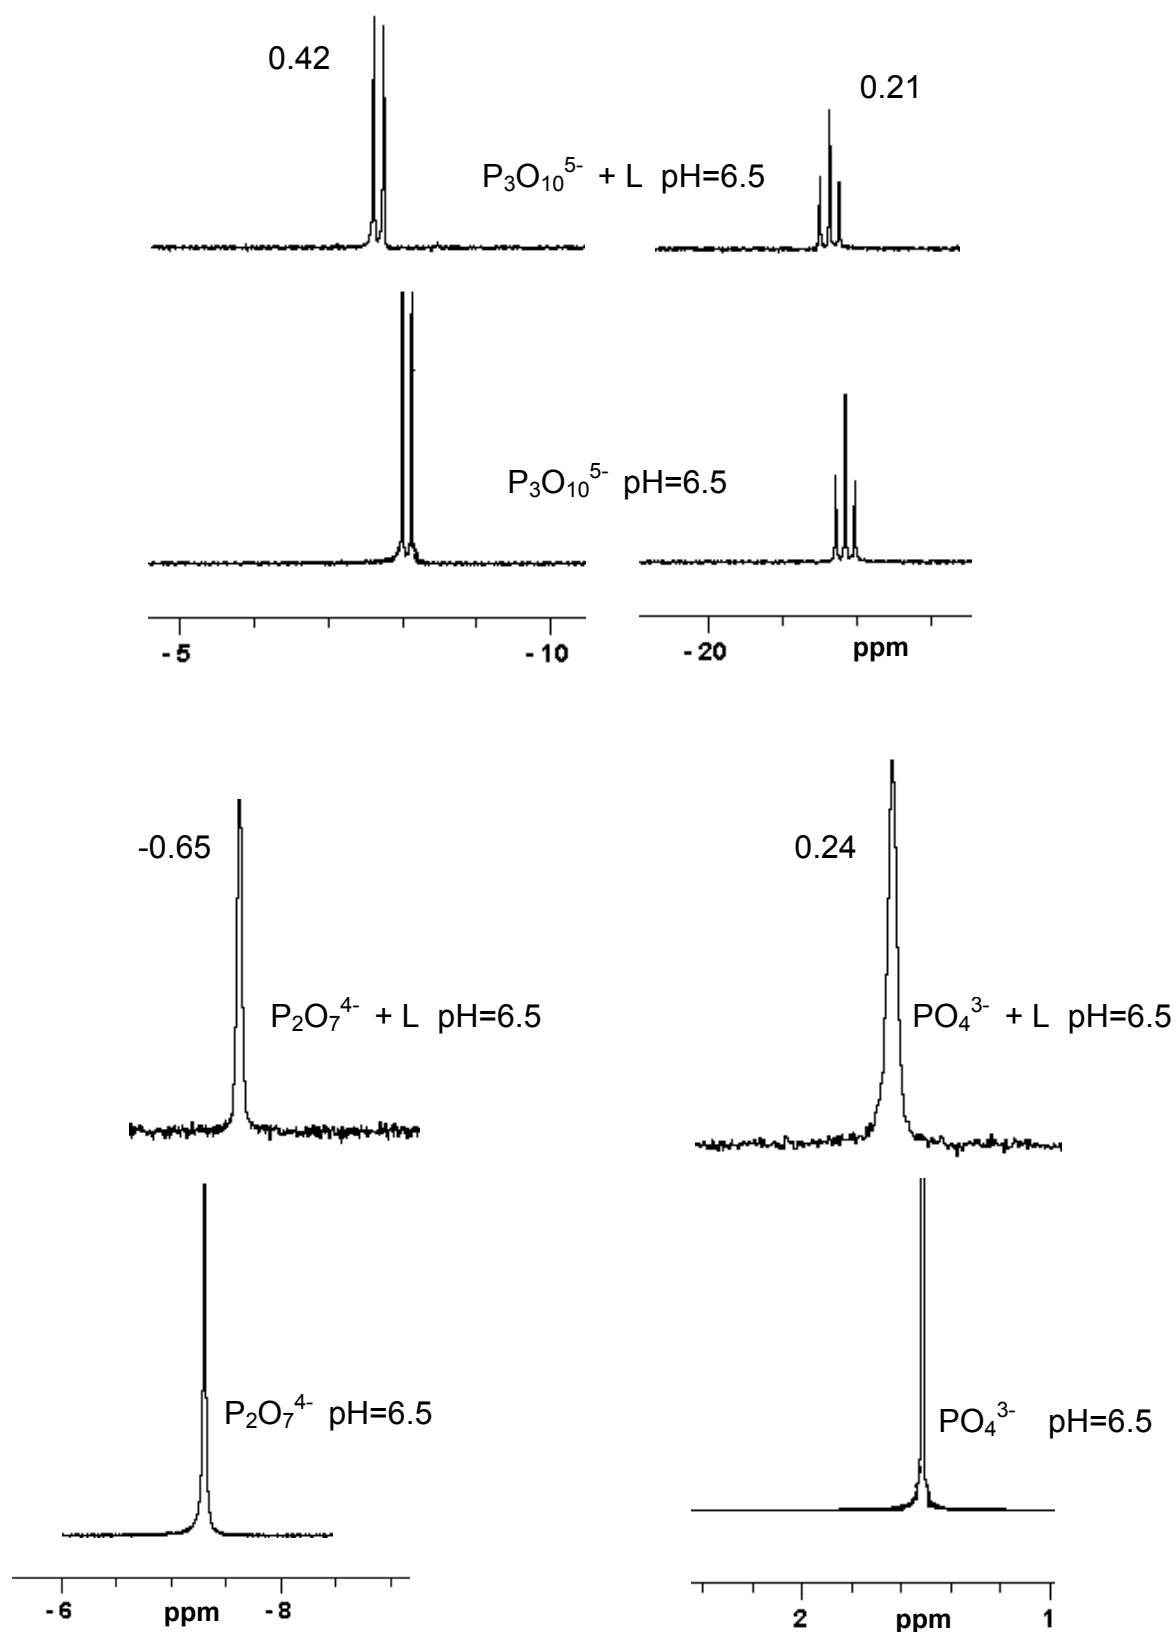

Figure S2.  $^{31}P$  NMR spectra of phosphate, diphosphate and -triphosphate in the absence and in the presence of equimolar amounts of HL. CIS (for 100% complexation) are shown close to the picks.

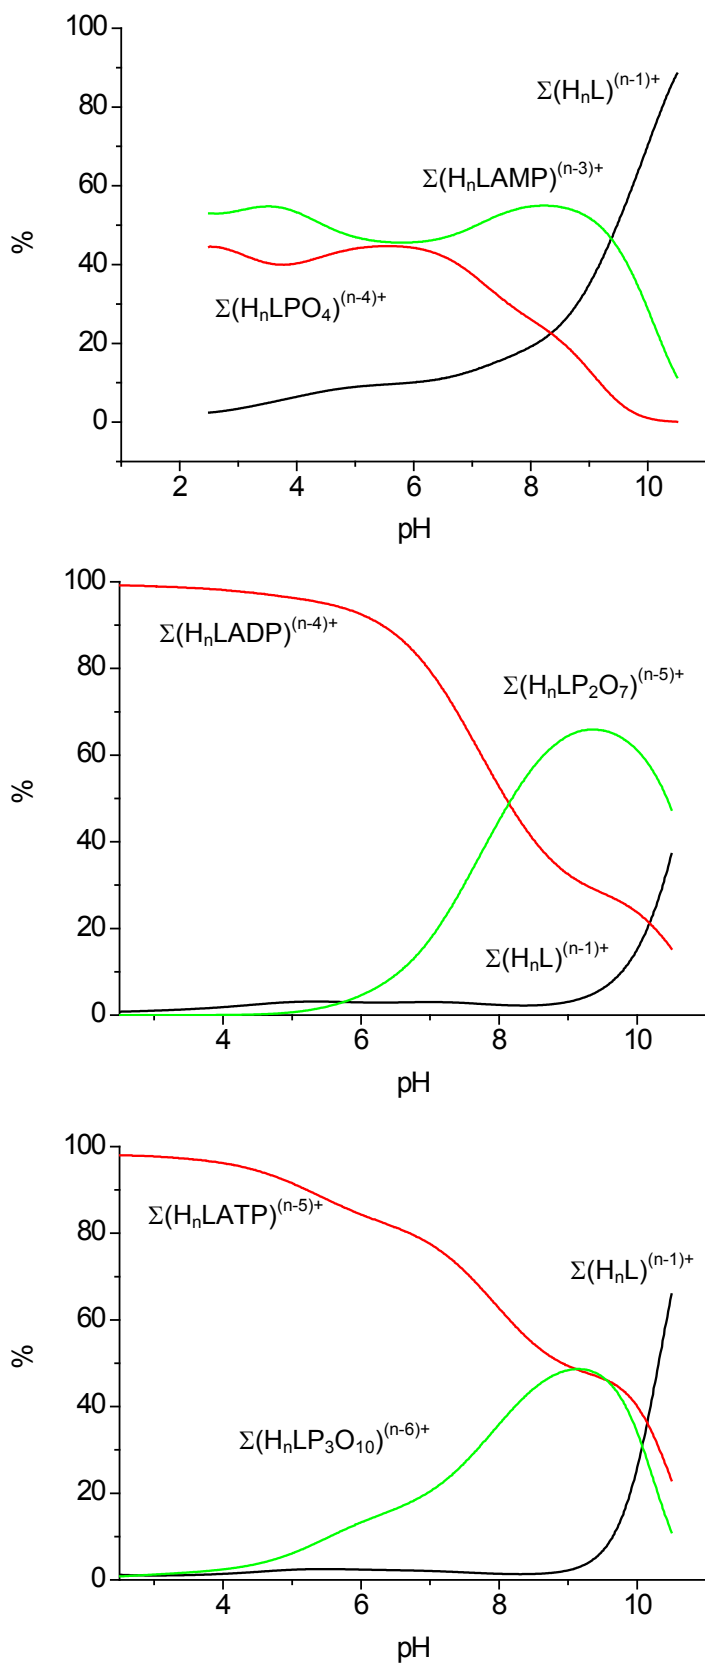

Figure S3. Selectivity diagrams calculated for the system HL/AMP, HL/ADP e HL/ATP showing the percentage of the overall concentration of receptor bound to each nucleotide as a function of pH. The overall concentration of free ligand is also shown. All reagents  $1 \times 10^3$  M.
